# Supplementary material for: Comprehensive Analysis of the Clinical and Biological Significances of Endoplasmic Reticulum Stress in Diffuse Gliomas
Source: PubMed Central journal article supplement (PMC8301220; doi:10.3389/fcell.2021.619396), 2021-07-09
Supplement: Data_Sheet_2.pdf [file Data_Sheet_2.pdf]

# Supplementary materials

## Supplementary Figures

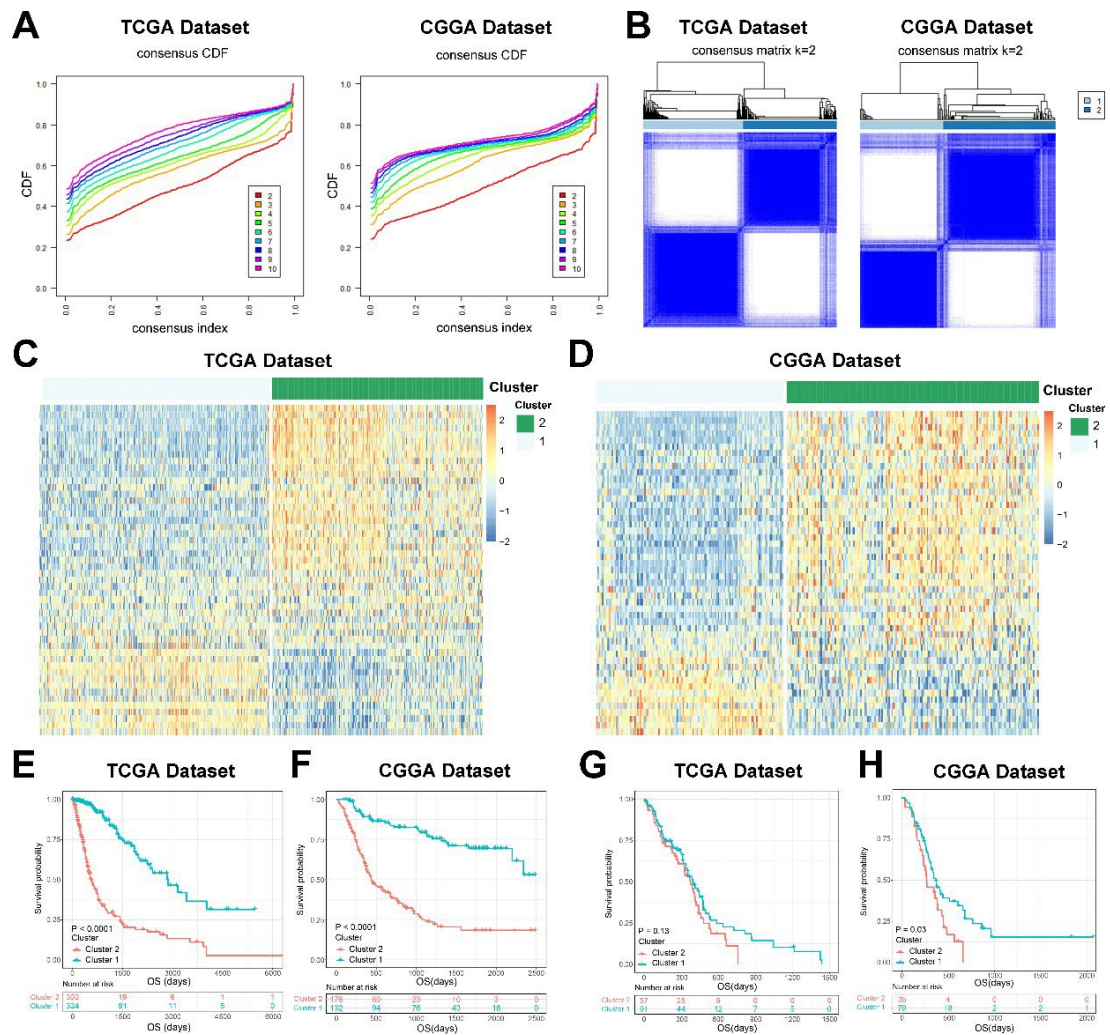

**Supplementary Fig. 1.** Consensus clustering for ER stress-related genes in glioma patients from TCGA and CGGA dataset.

(A) Consensus clustering CDF for  $k = 2$  to  $k = 10$ . (B) Consensus clustering matrix of glioma samples from TCGA and CGGA dataset for  $k = 2$ , respectively. (C, D) Heatmap of two clusters identified by the top 50 variable expression genes. (E, F) K-M survival curve analyses of patients in two clusters. (G, H) By performing Consensus clustering analysis, IDH wildtype GBM patients were also divided into two clusters, K-M survival curve analyses was performed to evaluated the prognosis of IDH wildtype GBM patients in two clusters.

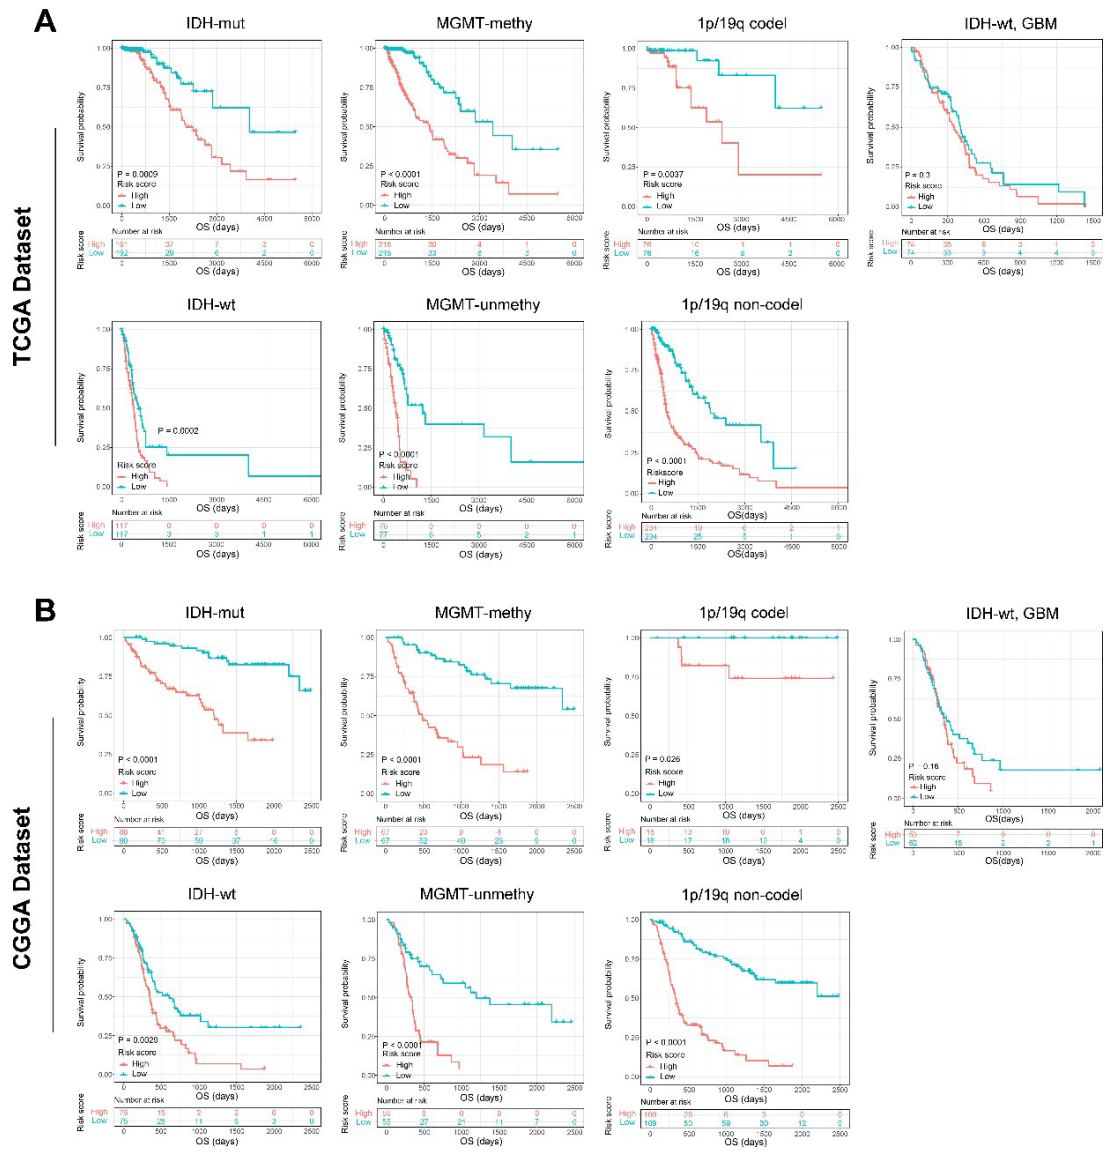

**Supplementary Fig. 2.** K-M survival analysis of the risk signature in glioma patients stratified by IDH mutation status, MGMT promoter methylation and 1p/19q co-deletion status in TCGA (A) and CGGA (B) datasets.

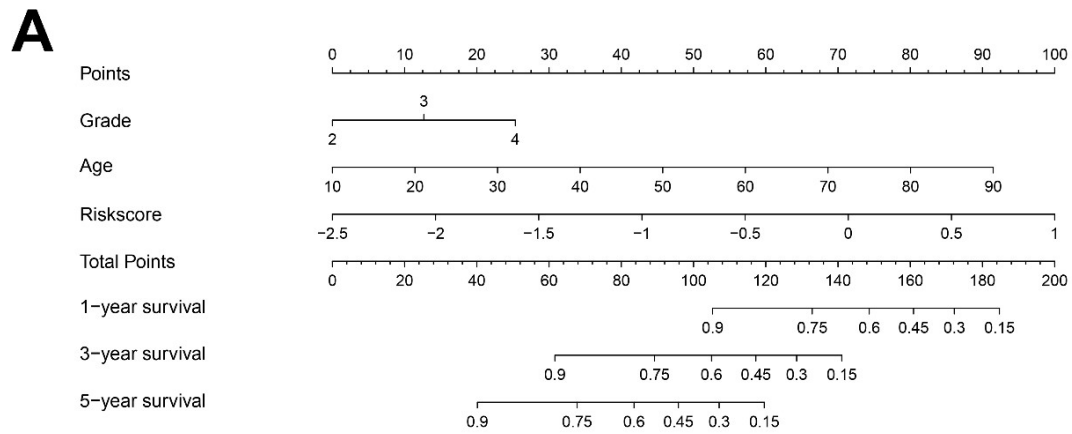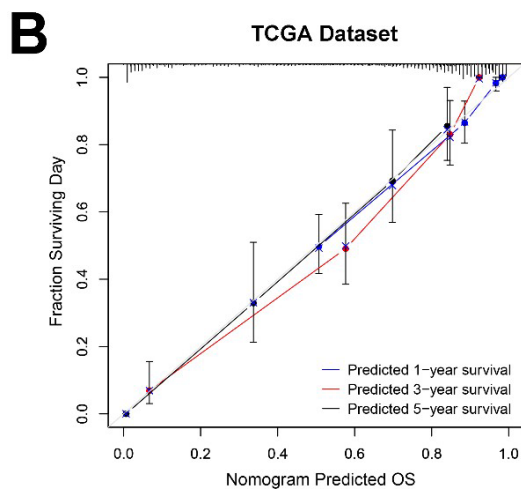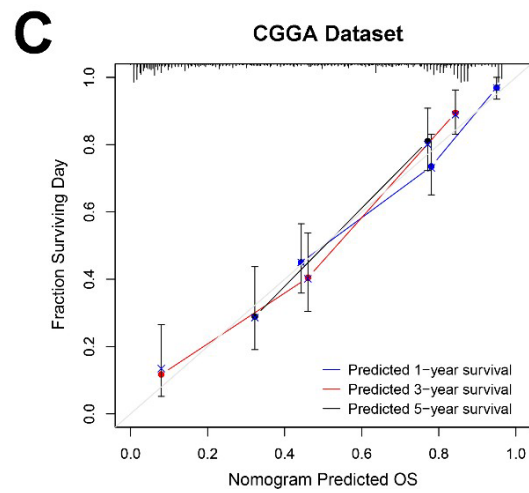

**Supplementary Fig. 3.** A nomogram model for predicting overall survival of patients with glioma.

(A) A nomogram model was constructed by integrating the clinicopathologic features and risk score of patients in the TCGA dataset. (B, C) The calibration curve of nomogram for predicting OS at 1-, 3- and 5-years in the TCGA and CGGA datasets.

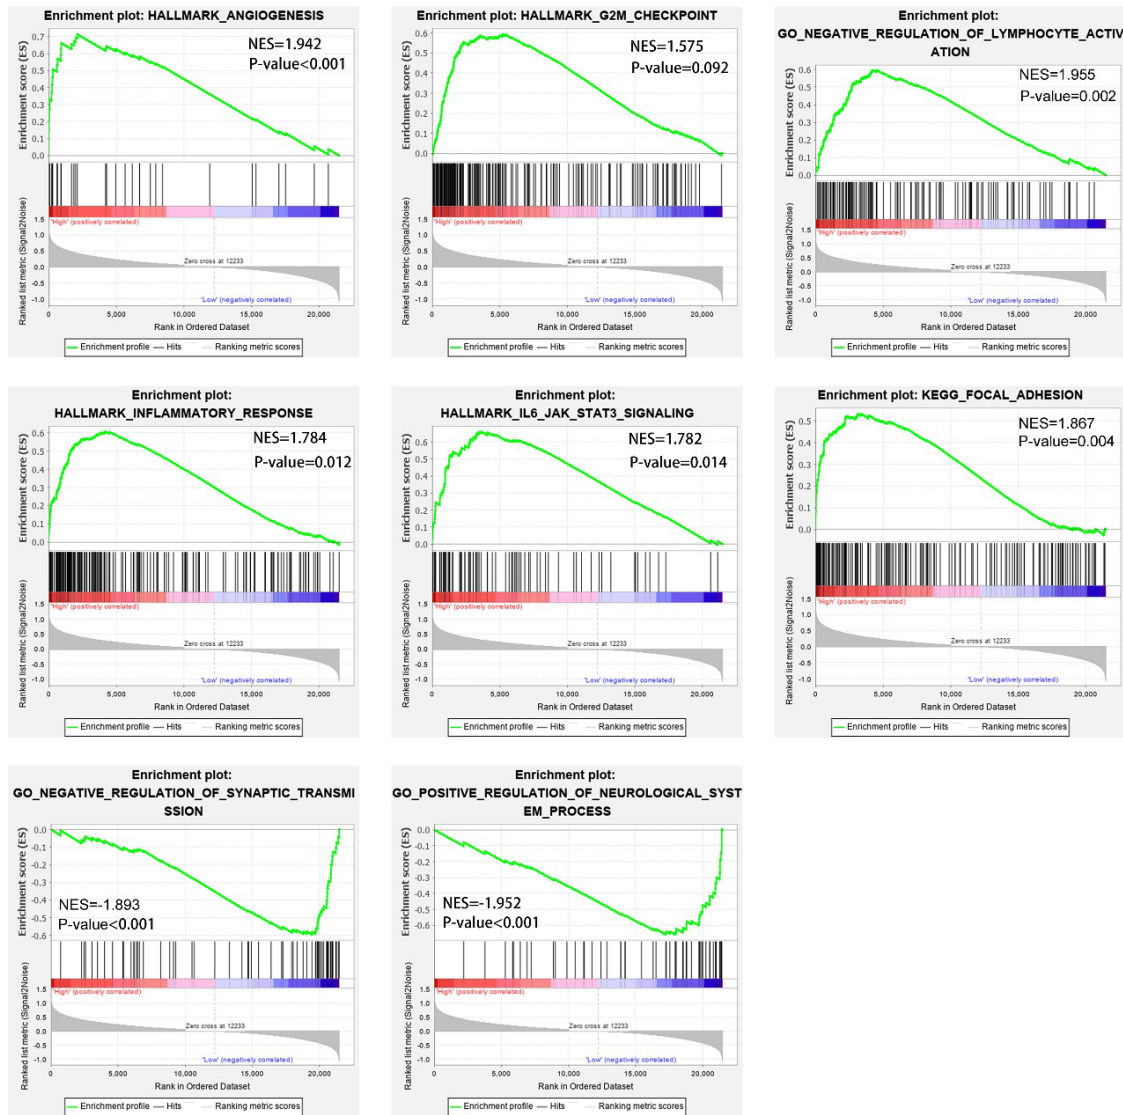

**Supplementary Fig. 4.** GSEA analysis was performed to investigate the biological functions and pathways that were tightly correlated with the ER stress activation.

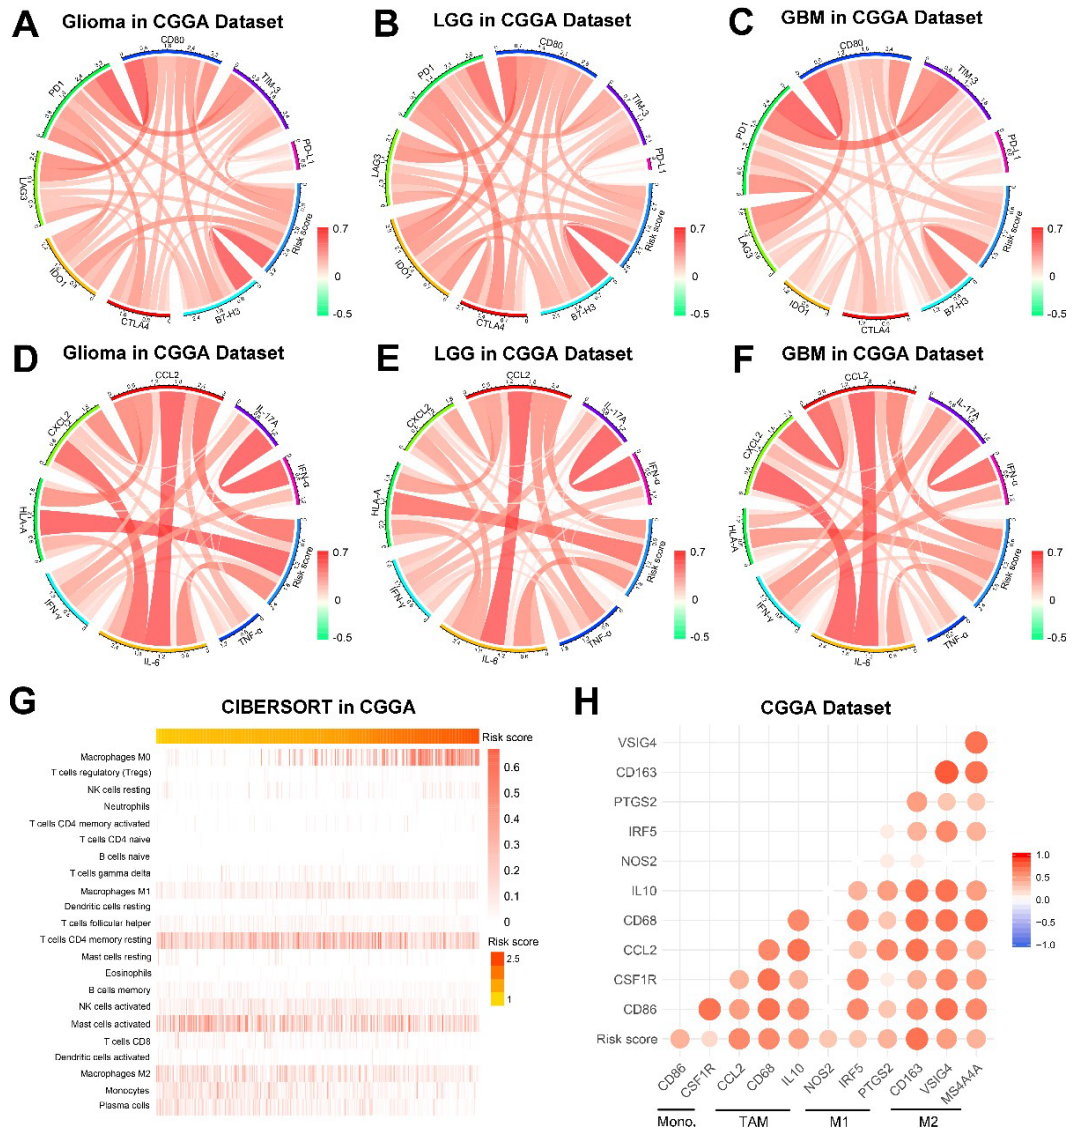

**Supplementary Fig. 5.** The ER stress activation related immunologic events in glioma samples in CGGA dataset.

(A-C) Correlation analysis between risk score signature and immune checkpoints in whole gliomas, low-grade gliomas and GBM, respectively. (D-F) Correlation analysis between risk score and inflammatory genes in whole grade of gliomas, low-grade gliomas and GBM, respectively. (G) CIBERSORT evaluating the proportion of various types of immune cell infiltrated into glioma samples. (H) Correlation analysis between risk score and biomarkers of monocytes and macrophages.

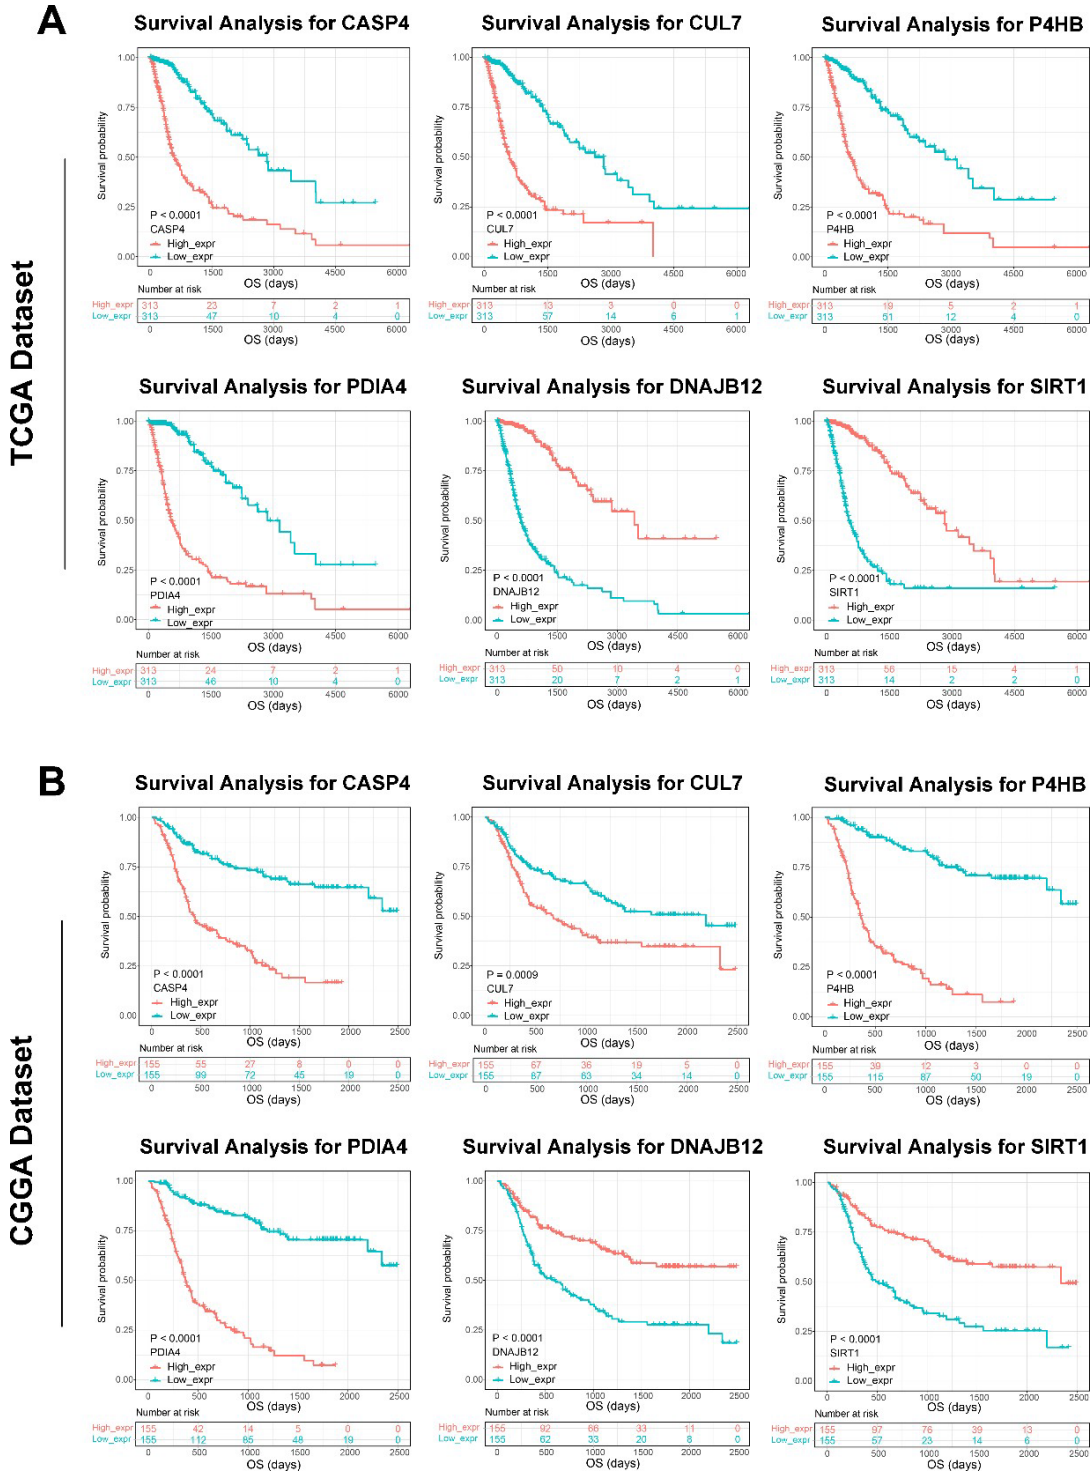

**Supplementary Fig. 6.** K-M survival analysis of each independent gene in the ER stress-related signature in TCGA (A) and CGGA (B) datasets.

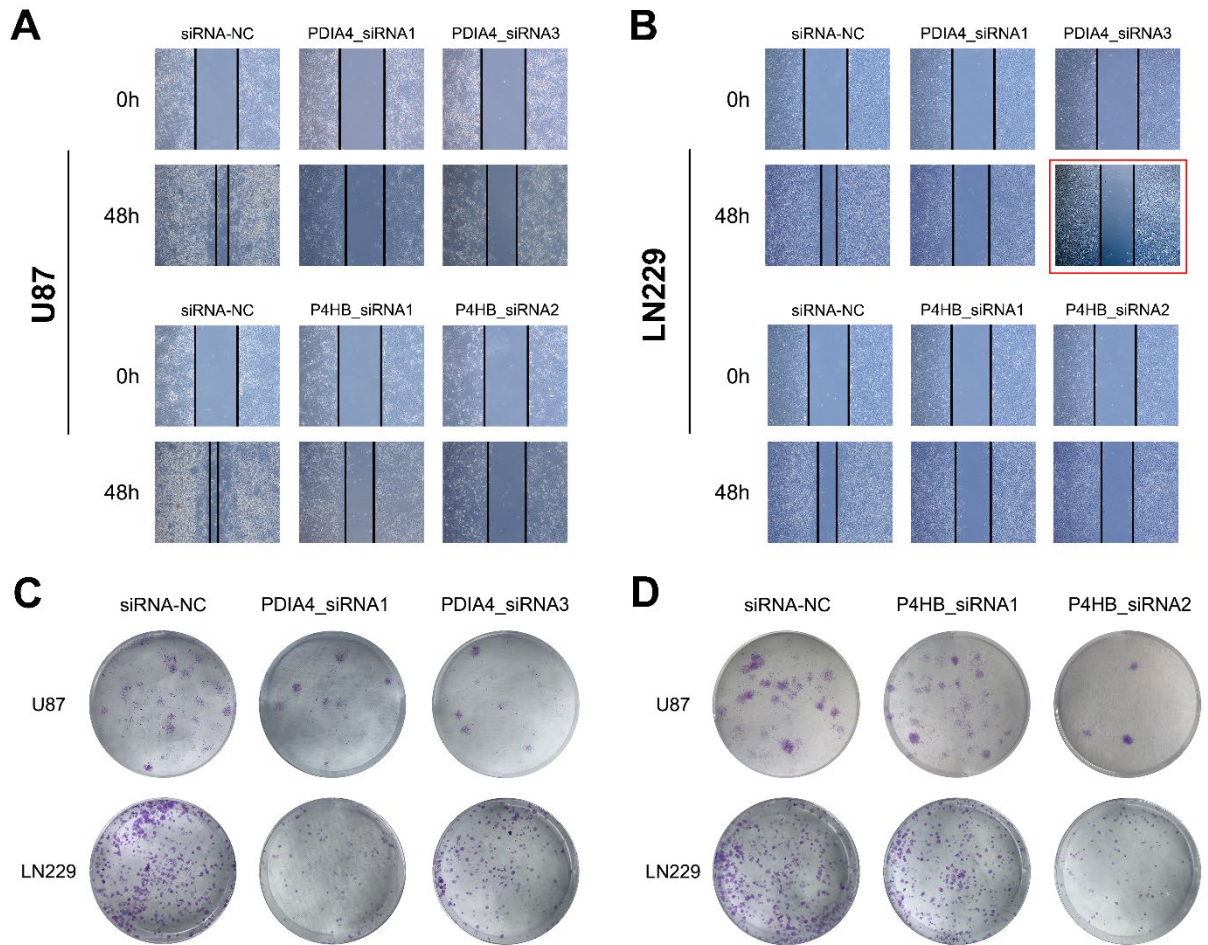

**Supplementary Fig. 7.** ER stress activation promotes migration and proliferative capacity of glioma cell lines *in vitro*.

(A, B) Cell scratch assay of U87 and LN229 cell lines treated with PDIA4 siRNA, P4HB siRNA and negative control. (C, D) Clonogenic assay of U87 and LN229 cell lines treated with PDIA4 siRNA, P4HB siRNA and negative control.

## Supplementary Tables

Supplementary Table 1.

### Characteristics of patients in cluster 1 and cluster 2 in CGGA dataset

| Characteristic       | N   | Cluster 1 | Cluster 2 | p value |
|----------------------|-----|-----------|-----------|---------|
| <b>Total cases</b>   | 310 | 132       | 178       |         |
| <b>Gender</b>        |     |           |           | 0.3377  |
| Male                 | 195 | 79        | 116       |         |
| Female               | 115 | 53        | 62        |         |
| <b>Age (years)</b>   |     |           |           | 0.0041  |
| ≤40                  | 133 | 69        | 64        |         |
| >40                  | 177 | 63        | 114       |         |
| <b>Grade</b>         |     |           |           | <0.0001 |
| II                   | 105 | 85        | 20        |         |
| III                  | 67  | 29        | 38        |         |
| IV                   | 138 | 18        | 120       |         |
| <b>Subtype</b>       |     |           |           | <0.0001 |
| Classical            | 70  | 13        | 57        |         |
| Mesenchymal          | 65  | 2         | 63        |         |
| Proneural            | 99  | 47        | 52        |         |
| Neural               | 76  | 70        | 6         |         |
| <b>IDH Status</b>    |     |           |           | <0.0001 |
| Mutation             | 160 | 100       | 60        |         |
| Wildtype             | 150 | 32        | 118       |         |
| <b>MGMT Promoter</b> |     |           |           | 0.3125  |
| Methylation          | 134 | 56        | 78        |         |
| Unmethylation        | 110 | 39        | 71        |         |
| <b>1p19q</b>         |     |           |           | 0.0001  |
| Codel                | 36  | 26        | 10        |         |
| Non-codel            | 218 | 83        | 135       |         |
| <b>Chemotherapy</b>  |     |           |           | 0.0068  |
| Yes                  | 155 | 55        | 100       |         |
| No                   | 124 | 64        | 60        |         |
| <b>Radiotherapy</b>  |     |           |           | 0.0898  |
| Yes                  | 207 | 98        | 109       |         |
| No                   | 80  | 29        | 51        |         |



**Supplementary Table 2. ER stress related gene list**

|          |          |         |         |          |         |           |         |
|----------|----------|---------|---------|----------|---------|-----------|---------|
| ACADVL   | BRSK2    | DNAJB12 | FCGR2B  | MAP3K5   | PTPN1   | SSR1      | TTC23L  |
| ADD1     | CALR     | DNAJB14 | FGF21   | MBTPS1   | PTPN2   | STC2      | TXNDC12 |
| AGR2     | CASP4    | DNAJB2  | FICD    | MBTPS2   | RASGRF1 | STT3B     | UBA5    |
| AIFM1    | CAV1     | DNAJB9  | FKBP14  | NCK1     | RASGRF2 | STUB1     | UBAC2   |
| ALOX15   | CCDC47   | DNAJC10 | FLOT1   | NCK2     | RCN3    | SULT1A3   | UBE2G2  |
| AMFR     | CCL2     | DNAJC18 | FOXRED2 | NFE2L1   | RHBDD1  | SVIP      | UBE2J1  |
| ANKS4B   | CCND1    | DNAJC3  | GET4    | NFE2L2   | RNF103  | SYVN1     | UBE2J2  |
| ANKZF1   | CDK5RAP3 | EDEM1   | GFPT1   | NPLOC4   | RNF121  | TARDBP    | UBE2K   |
| APAF1    | CEBPB    | EDEM2   | GORASP2 | NRBF2    | RNF139  | TATDN2    | UBE4A   |
| ARFGAP1  | CFTR     | EDEM3   | GOSR2   | OPA1     | RNF175  | TBL2      | UBE4B   |
| ASNA1    | CHAC1    | EEF2    | GRINA   | OS9      | RNF183  | THBS1     | UBQLN1  |
| ASNS     | CLU      | EIF2AK2 | GSK3A   | P4HB     | RNF185  | THBS4     | UBQLN2  |
| ATF3     | COL4A3BP | EIF2AK3 | GSK3B   | PARK7    | RNF186  | TLN1      | UBXN1   |
| ATF4     | COPS5    | EIF2AK4 | HDGF    | PARP16   | RNF5    | TMBIM6    | UBXN4   |
| ATF6B    | CREB3L1  | EIF2B5  | HERPUD1 | PDIA2    | RNFT1   | TMCO1     | UBXN6   |
| ATF6     | CREB3L2  | EIF2S1  | HM13    | PDIA3    | SCAMP5  | TMEM117   | UBXN8   |
| ATG10    | CREB3L3  | EP300   | HSP90B1 | PDIA4    | SDF2L1  | TMEM129   | UFC1    |
| ATP2A1   | CREB3L4  | ERLEC1  | HSPA13  | PDIA5    | SDF2    | TMEM33    | UFM1    |
| ATP2A2   | CREB3    | ERLIN1  | HSPA1A  | PDIA6    | SEC16A  | TMEM67    | UGGT1   |
| ATP6V0D1 | CTDSP2   | ERLIN2  | HSPA5   | PDX1     | SEC31A  | TMTC3     | UGGT2   |
| ATXN3    | CTH      | ERN1    | HYOU1   | PIK3R1   | SEC61B  | TMUB1     | USP13   |
| AUP1     | CUL7     | ERN2    | IGFBP1  | PIK3R2   | SEL1L   | TMUB2     | USP14   |
| BAK1     | CXXC1    | ERP27   | ITPR1   | PLA2G6   | SERINC3 | TMX1      | USP19   |
| BAX      | DAB2IP   | ERP29   | JKAMP   | PMAIP1   | SERP1   | TNFRSF10B | USP25   |
| BBC3     | DCTN1    | ERP44   | JUN     | PML      | SERP2   | TOR1A     | VAPB    |
| BCAP31   | DDIT3    | EXTL1   | KDEL3   | POMT2    | SESN2   | TP53      | VCP     |
| BCL2L11  | DDR3K1   | EXTL2   | KLHDC3  | PPP1R15A | SGTA    | TPP1      | WFS1    |
| BCL2L1   | DDX11    | EXTL3   | LMNA    | PPP1R15B | SGTB    | TRAF2     | WIPI1   |
| BCL2     | DERL1    | FAF2    | LRRK2   | PPP2CB   | SHC1    | TRIB3     | XBP1    |
| BFAR     | DERL2    | FAM129A | MAGEA3  | PPP2R5B  | SIRT1   | TRIM13    | YIF1A   |
| BHLHA15  | DERL3    | FBXO2   | MAN1B1  | PREB     | SRPRB   | TRIM25    | YOD1    |
| BOK      | DNAJB11  | FBXO6   | MANF    | PSMC6    | SRPX    | TSPYL2    | ZBTB17  |

**Supplementary Table 3.**

Univariate Cox analysis of ER stress-related genes

| Gene    | HR       | Low95    | High95   | P-value  |
|---------|----------|----------|----------|----------|
| P4HB    | 3.853964 | 3.194749 | 4.649204 | 4.06E-45 |
| CASP4   | 2.060799 | 1.854444 | 2.290115 | 3.90E-41 |
| EDEM2   | 3.165615 | 2.670171 | 3.752988 | 3.47E-40 |
| PDIA4   | 2.865082 | 2.450395 | 3.349949 | 9.34E-40 |
| PDIA6   | 3.572629 | 2.951084 | 4.325081 | 5.78E-39 |
| TBL2    | 4.143845 | 3.346902 | 5.130551 | 6.76E-39 |
| SHC1    | 2.218424 | 1.967887 | 2.500857 | 8.06E-39 |
| DNAJB12 | 0.1122   | 0.080628 | 0.156135 | 1.70E-38 |
| SIRT1   | 0.230743 | 0.184752 | 0.288182 | 3.05E-38 |
| PLA2G6  | 0.377721 | 0.325799 | 0.437918 | 4.26E-38 |
| KDELR3  | 1.572906 | 1.46704  | 1.686411 | 3.53E-37 |
| WIPI1   | 2.834096 | 2.395594 | 3.352863 | 5.98E-34 |
| CALR    | 3.859059 | 3.090329 | 4.819013 | 9.93E-33 |
| FCGR2B  | 1.413263 | 1.334385 | 1.496803 | 3.69E-32 |
| RNFT1   | 2.55893  | 2.175415 | 3.010057 | 8.15E-30 |
| ERP44   | 2.73714  | 2.297285 | 3.261214 | 1.95E-29 |
| PTPN2   | 3.342872 | 2.707826 | 4.126849 | 3.01E-29 |
| BAK1    | 3.593299 | 2.871122 | 4.497126 | 5.51E-29 |
| UBXN1   | 0.233887 | 0.180852 | 0.302474 | 1.68E-28 |
| MANF    | 2.746997 | 2.296271 | 3.286193 | 2.17E-28 |
| PDIA5   | 1.79805  | 1.619976 | 1.995699 | 2.86E-28 |
| SERP2   | 0.472897 | 0.413885 | 0.540324 | 3.35E-28 |
| RASGRF1 | 0.728796 | 0.688427 | 0.771532 | 1.42E-27 |
| ADD1    | 0.175958 | 0.12864  | 0.240682 | 1.57E-27 |
| HSPA5   | 3.159553 | 2.566442 | 3.889733 | 2.10E-27 |
| TXNDC12 | 3.70597  | 2.922775 | 4.699033 | 2.94E-27 |
| TOR1A   | 5.87437  | 4.257646 | 8.105    | 4.22E-27 |
| CUL7    | 2.001318 | 1.763777 | 2.27085  | 5.17E-27 |
| DERL2   | 4.035137 | 3.128968 | 5.203738 | 5.90E-27 |
| FAM129A | 1.66412  | 1.515546 | 1.82726  | 1.35E-26 |
| BCAP31  | 5.052964 | 3.746269 | 6.815434 | 2.64E-26 |
| SCAMP5  | 0.542857 | 0.483805 | 0.609117 | 2.56E-25 |
| DAB2IP  | 0.378686 | 0.315259 | 0.454875 | 2.99E-25 |
| BRSK2   | 0.66714  | 0.618027 | 0.720156 | 3.24E-25 |
| PIK3R1  | 0.486135 | 0.423409 | 0.558153 | 1.41E-24 |
| HM13    | 3.376275 | 2.673773 | 4.263351 | 1.57E-24 |
| SRPRB   | 2.956089 | 2.399947 | 3.641106 | 2.14E-24 |
| XBP1    | 2.744248 | 2.254946 | 3.339724 | 7.10E-24 |
| EEF2    | 0.304555 | 0.241377 | 0.384269 | 1.21E-23 |
| PREB    | 4.356979 | 3.264506 | 5.81505  | 1.64E-23 |
| UBQLN2  | 0.193438 | 0.139995 | 0.267283 | 2.33E-23 |

---

|           |          |          |          |          |
|-----------|----------|----------|----------|----------|
| LMNA      | 2.283677 | 1.940998 | 2.686854 | 2.40E-23 |
| SEC61B    | 3.268575 | 2.572476 | 4.153035 | 3.23E-22 |
| RCN3      | 1.656728 | 1.495081 | 1.835852 | 5.52E-22 |
| THBS1     | 1.328443 | 1.253789 | 1.407542 | 6.31E-22 |
| DERL3     | 1.733509 | 1.548299 | 1.940875 | 1.39E-21 |
| ERP27     | 1.480476 | 1.365231 | 1.60545  | 2.33E-21 |
| GOSR2     | 6.328056 | 4.321794 | 9.265664 | 2.47E-21 |
| BAX       | 2.564453 | 2.101995 | 3.128655 | 1.66E-20 |
| UBE2J2    | 3.41657  | 2.633988 | 4.431663 | 2.10E-20 |
| PPP1R15A  | 1.961259 | 1.699778 | 2.262965 | 2.80E-20 |
| TSPYL2    | 0.51856  | 0.450959 | 0.596295 | 3.12E-20 |
| HSP90B1   | 3.388866 | 2.606211 | 4.406557 | 8.28E-20 |
| PTPN1     | 5.166393 | 3.62755  | 7.358029 | 8.87E-20 |
| BFAR      | 4.398289 | 3.186995 | 6.069965 | 2.02E-19 |
| DCTN1     | 0.366356 | 0.294399 | 0.455901 | 2.25E-19 |
| TMUB1     | 2.292443 | 1.91175  | 2.748945 | 3.43E-19 |
| TMEM67    | 1.823825 | 1.59736  | 2.082397 | 6.48E-19 |
| CAV1      | 1.456275 | 1.338712 | 1.584162 | 2.09E-18 |
| MAP3K5    | 0.687224 | 0.631827 | 0.747477 | 2.18E-18 |
| DNAJB11   | 3.188682 | 2.452981 | 4.145036 | 4.53E-18 |
| OPA1      | 0.289204 | 0.218268 | 0.383193 | 5.58E-18 |
| ATF3      | 1.507305 | 1.372127 | 1.6558   | 1.14E-17 |
| KLHDC3    | 0.251728 | 0.183427 | 0.345462 | 1.33E-17 |
| TMCO1     | 3.933461 | 2.872253 | 5.386754 | 1.38E-17 |
| CEBPB     | 1.796624 | 1.567576 | 2.059139 | 3.75E-17 |
| ATG10     | 2.603721 | 2.077861 | 3.262666 | 9.28E-17 |
| AUP1      | 2.844334 | 2.221711 | 3.641442 | 1.10E-16 |
| EXTL3     | 2.69778  | 2.127512 | 3.420906 | 2.59E-16 |
| EP300     | 0.523533 | 0.448238 | 0.611476 | 3.12E-16 |
| TNFRSF10B | 1.957619 | 1.665039 | 2.301611 | 4.19E-16 |
| DNAJC10   | 3.329586 | 2.487735 | 4.456319 | 6.05E-16 |
| SDF2L1    | 2.038647 | 1.715083 | 2.423254 | 6.59E-16 |
| FLOT1     | 2.758143 | 2.155182 | 3.529796 | 7.57E-16 |
| EXTL2     | 2.732572 | 2.139761 | 3.489618 | 7.84E-16 |
| ASNA1     | 2.255765 | 1.846983 | 2.755022 | 1.53E-15 |
| TMBIM6    | 4.068423 | 2.878033 | 5.751175 | 1.93E-15 |
| ERP29     | 3.098944 | 2.341647 | 4.101155 | 2.54E-15 |
| RNF103    | 0.179079 | 0.116854 | 0.274439 | 2.87E-15 |
| TRIM13    | 0.339027 | 0.259186 | 0.443463 | 2.91E-15 |
| CCL2      | 1.313213 | 1.22675  | 1.405769 | 4.46E-15 |
| EDEM1     | 2.959507 | 2.24564  | 3.900306 | 1.32E-14 |
| THBS4     | 1.410405 | 1.292037 | 1.539617 | 1.48E-14 |
| TMTC3     | 1.851332 | 1.578093 | 2.171881 | 4.05E-14 |
| PML       | 2.587797 | 2.017702 | 3.318969 | 6.96E-14 |

---

---

|         |          |          |          |          |
|---------|----------|----------|----------|----------|
| OS9     | 1.540746 | 1.375613 | 1.725702 | 7.82E-14 |
| DNAJB9  | 2.153395 | 1.759304 | 2.635765 | 1.02E-13 |
| PDIA3   | 2.61744  | 2.030679 | 3.373745 | 1.09E-13 |
| FBXO6   | 1.789962 | 1.529764 | 2.094416 | 3.75E-13 |
| DDIT3   | 1.51712  | 1.35508  | 1.698537 | 4.74E-13 |
| PDIA2   | 0.765206 | 0.71111  | 0.823417 | 8.43E-13 |
| DNAJC18 | 0.396144 | 0.306256 | 0.512414 | 1.76E-12 |
| CTDSP2  | 1.695182 | 1.462664 | 1.964662 | 2.35E-12 |
| NPLOC4  | 4.855602 | 3.116513 | 7.565143 | 2.86E-12 |
| UBE2G2  | 0.304916 | 0.217606 | 0.427258 | 5.18E-12 |
| JUN     | 1.651171 | 1.430994 | 1.905226 | 6.52E-12 |
| TMX1    | 2.542912 | 1.945029 | 3.324579 | 8.81E-12 |
| UBXN8   | 2.870791 | 2.119045 | 3.889223 | 9.92E-12 |
| UBE4A   | 0.26575  | 0.180599 | 0.39105  | 1.77E-11 |
| EIF2AK4 | 3.023458 | 2.189957 | 4.17419  | 1.77E-11 |
| FBXO2   | 0.765275 | 0.707113 | 0.828222 | 3.28E-11 |
| DERL1   | 2.862918 | 2.091724 | 3.918444 | 5.08E-11 |
| NCK1    | 2.80892  | 2.058028 | 3.833783 | 7.63E-11 |
| SDF2    | 2.403138 | 1.838772 | 3.140722 | 1.36E-10 |
| RNF185  | 0.276538 | 0.185594 | 0.412046 | 2.66E-10 |
| DDRKG1  | 2.529138 | 1.893826 | 3.377573 | 3.24E-10 |
| CHAC1   | 1.400449 | 1.260352 | 1.556119 | 3.78E-10 |
| DNAJB2  | 0.467401 | 0.367683 | 0.594163 | 5.23E-10 |
| GSK3B   | 0.484761 | 0.385435 | 0.609683 | 6.03E-10 |
| SEC31A  | 2.409759 | 1.816973 | 3.195942 | 1.03E-09 |
| NFE2L2  | 3.278393 | 2.238066 | 4.802299 | 1.09E-09 |
| USP13   | 0.391509 | 0.28953  | 0.529407 | 1.12E-09 |
| RASGRF2 | 0.722972 | 0.651167 | 0.802694 | 1.22E-09 |
| ATXN3   | 0.375147 | 0.273351 | 0.514853 | 1.28E-09 |
| TRIB3   | 1.427584 | 1.272357 | 1.60175  | 1.35E-09 |
| USP14   | 2.699096 | 1.940602 | 3.754052 | 3.66E-09 |
| GRINA   | 0.447578 | 0.341929 | 0.585871 | 4.86E-09 |
| FOXRED2 | 0.476445 | 0.371597 | 0.610876 | 5.02E-09 |
| PSMC6   | 0.333847 | 0.230969 | 0.48255  | 5.33E-09 |
| CREB3L2 | 1.885026 | 1.523076 | 2.332992 | 5.62E-09 |
| FAF2    | 3.637522 | 2.345016 | 5.64242  | 8.16E-09 |
| TMUB2   | 3.875167 | 2.440796 | 6.152467 | 9.28E-09 |
| COPS5   | 2.711918 | 1.929283 | 3.812038 | 9.33E-09 |
| RNF5    | 0.48563  | 0.378921 | 0.62239  | 1.16E-08 |
| EXTL1   | 0.733367 | 0.659178 | 0.815905 | 1.21E-08 |
| TP53    | 1.759926 | 1.445538 | 2.14269  | 1.80E-08 |
| SEC16A  | 0.456184 | 0.342563 | 0.60749  | 7.86E-08 |
| GET4    | 2.341863 | 1.710172 | 3.206883 | 1.12E-07 |
| BCL2    | 0.63412  | 0.53525  | 0.751254 | 1.39E-07 |

---

---

|          |          |          |          |          |
|----------|----------|----------|----------|----------|
| ASNS     | 1.702518 | 1.391216 | 2.083477 | 2.41E-07 |
| SSR1     | 3.410561 | 2.137195 | 5.442614 | 2.68E-07 |
| TTC23L   | 1.349094 | 1.201107 | 1.515313 | 4.39E-07 |
| EIF2AK3  | 2.018027 | 1.530626 | 2.660632 | 6.43E-07 |
| UBAC2    | 2.440327 | 1.711063 | 3.480406 | 8.43E-07 |
| UBA5     | 0.328506 | 0.209722 | 0.514567 | 1.16E-06 |
| ERN2     | 1.543305 | 1.29176  | 1.843833 | 1.75E-06 |
| GFPT1    | 0.451475 | 0.32504  | 0.627092 | 2.10E-06 |
| USP19    | 0.477803 | 0.351064 | 0.650297 | 2.65E-06 |
| SESN2    | 1.649293 | 1.332589 | 2.041265 | 4.24E-06 |
| CREB3L1  | 1.168076 | 1.092477 | 1.248906 | 5.34E-06 |
| COL4A3BP | 0.487844 | 0.356013 | 0.668492 | 7.99E-06 |
| HYOU1    | 2.104219 | 1.517847 | 2.917116 | 8.05E-06 |
| DNAJC3   | 2.164287 | 1.541289 | 3.039105 | 8.28E-06 |
| NCK2     | 1.905561 | 1.433717 | 2.53269  | 8.92E-06 |
| SRPX     | 1.259817 | 1.136122 | 1.396979 | 1.19E-05 |
| CLU      | 1.382935 | 1.195918 | 1.599199 | 1.22E-05 |
| SGTB     | 0.596438 | 0.473063 | 0.75199  | 1.24E-05 |
| SEL1L    | 0.575932 | 0.44938  | 0.738123 | 1.31E-05 |
| CREB3L3  | 0.705281 | 0.602077 | 0.826175 | 1.52E-05 |
| PPP2R5B  | 0.494055 | 0.358807 | 0.680284 | 1.56E-05 |
| PARP16   | 1.905095 | 1.421195 | 2.553759 | 1.63E-05 |
| USP25    | 0.525337 | 0.391698 | 0.704572 | 1.72E-05 |
| BCL2L1   | 1.938785 | 1.431133 | 2.626511 | 1.92E-05 |
| PARK7    | 1.858102 | 1.394487 | 2.475852 | 2.33E-05 |
| MAN1B1   | 1.88519  | 1.397978 | 2.542201 | 3.24E-05 |
| GORASP2  | 2.503962 | 1.596643 | 3.92688  | 6.39E-05 |
| MAGEA3   | 1.279469 | 1.132524 | 1.445481 | 7.52E-05 |
| TPP1     | 1.62771  | 1.27705  | 2.074658 | 8.30E-05 |
| ARFGAP1  | 0.558138 | 0.417208 | 0.746672 | 8.59E-05 |
| CFTR     | 0.771461 | 0.677497 | 0.878458 | 9.02E-05 |
| CREB3L4  | 0.706556 | 0.593283 | 0.841455 | 9.77E-05 |
| SYVN1    | 0.436995 | 0.288126 | 0.662784 | 9.81E-05 |
| EIF2AK2  | 1.478893 | 1.21015  | 1.807317 | 0.000131 |
| TRIM25   | 1.664628 | 1.276971 | 2.169968 | 0.000165 |
| PIK3R2   | 0.596827 | 0.455435 | 0.782115 | 0.000183 |
| ACADVL   | 1.643808 | 1.266867 | 2.132904 | 0.000184 |
| GSK3A    | 1.804888 | 1.323336 | 2.461672 | 0.000192 |
| ATP2A2   | 0.597113 | 0.455359 | 0.782996 | 0.000192 |
| YOD1     | 0.583394 | 0.435331 | 0.781816 | 0.000309 |
| EDEM3    | 0.580764 | 0.431631 | 0.781424 | 0.000332 |
| FKBP14   | 1.463955 | 1.184584 | 1.809213 | 0.000419 |
| POMT2    | 0.583773 | 0.432373 | 0.788186 | 0.000442 |
| UBXN4    | 2.20004  | 1.404284 | 3.446723 | 0.000577 |

---

---

|          |          |          |          |          |
|----------|----------|----------|----------|----------|
| FGF21    | 1.665145 | 1.238357 | 2.239021 | 0.000738 |
| UBE4B    | 0.62584  | 0.474119 | 0.826112 | 0.000938 |
| ERLEC1   | 1.91821  | 1.303801 | 2.822157 | 0.000944 |
| CREB3    | 1.752651 | 1.248684 | 2.460019 | 0.001179 |
| LRRK2    | 1.207116 | 1.076036 | 1.354163 | 0.00133  |
| ATP6V0D1 | 0.560554 | 0.385542 | 0.815009 | 0.002436 |
| ANKZF1   | 0.706171 | 0.563036 | 0.885695 | 0.00261  |
| NRBF2    | 1.643121 | 1.181895 | 2.284337 | 0.003136 |
| DNAJB14  | 0.734964 | 0.598974 | 0.901828 | 0.00318  |
| ERLIN1   | 1.743986 | 1.191619 | 2.552397 | 0.004208 |
| CCND1    | 0.838782 | 0.742188 | 0.947947 | 0.004858 |
| HERPUD1  | 1.468653 | 1.123392 | 1.920027 | 0.00494  |
| STUB1    | 0.607098 | 0.428005 | 0.861131 | 0.005138 |
| WFS1     | 0.756124 | 0.616413 | 0.927501 | 0.007318 |
| ATF6B    | 0.563322 | 0.36924  | 0.85942  | 0.007747 |
| HDGF     | 1.624704 | 1.13487  | 2.325962 | 0.008024 |
| STT3B    | 1.407856 | 1.089156 | 1.81981  | 0.008998 |
| RHBDD1   | 1.546828 | 1.088164 | 2.198818 | 0.015065 |
| UFC1     | 1.585949 | 1.086423 | 2.315151 | 0.016875 |
| UGGT1    | 1.557133 | 1.078106 | 2.249004 | 0.018231 |
| TRAF2    | 1.464986 | 1.059122 | 2.026381 | 0.021055 |
| RNF175   | 1.111433 | 1.015574 | 1.21634  | 0.021689 |
| AGR2     | 0.819997 | 0.688128 | 0.977137 | 0.026519 |
| HSPA1A   | 0.873609 | 0.774446 | 0.98547  | 0.027944 |
| FICD     | 0.815336 | 0.677163 | 0.981703 | 0.031171 |
| CCDC47   | 1.626975 | 1.044495 | 2.534285 | 0.031359 |
| JKAMP    | 1.516035 | 1.023835 | 2.244855 | 0.037748 |
| EIF2S1   | 1.461937 | 1.018125 | 2.099211 | 0.03966  |
| SVIP     | 0.865971 | 0.754398 | 0.994045 | 0.04087  |
| RNF183   | 0.853403 | 0.730704 | 0.996704 | 0.045322 |
| MBTPS1   | 0.636564 | 0.408815 | 0.991192 | 0.045595 |
| PDX1     | 1.083398 | 1.001221 | 1.172319 | 0.046558 |
| VCP      | 1.703621 | 1.001717 | 2.897353 | 0.049265 |
| TMEM117  | 1.298863 | 1.000783 | 1.685726 | 0.049316 |
| STC2     | 0.917428 | 0.841685 | 0.999986 | 0.049964 |
| DDX11    | 1.131991 | 0.986484 | 1.298961 | 0.077377 |
| ZBTB17   | 0.771653 | 0.57647  | 1.032923 | 0.081465 |
| SULT1A3  | 1.148357 | 0.979851 | 1.345841 | 0.087533 |
| BOK      | 0.929795 | 0.854197 | 1.012084 | 0.092501 |
| ANKS4B   | 0.766861 | 0.559685 | 1.050726 | 0.098531 |
| MBTPS2   | 0.788591 | 0.592041 | 1.050393 | 0.104413 |
| UBXN6    | 0.734947 | 0.50668  | 1.066053 | 0.104613 |
| AIFM1    | 1.417109 | 0.929039 | 2.161586 | 0.1056   |
| EIF2B5   | 0.651393 | 0.382148 | 1.110338 | 0.115185 |

---

---

|          |          |          |          |          |
|----------|----------|----------|----------|----------|
| SGTA     | 0.742474 | 0.507408 | 1.086439 | 0.125248 |
| IGFBP1   | 1.065181 | 0.982074 | 1.155321 | 0.127627 |
| PMAIP1   | 1.097863 | 0.968958 | 1.243917 | 0.142886 |
| TLN1     | 1.195408 | 0.932622 | 1.532238 | 0.158769 |
| CTH      | 1.133039 | 0.951969 | 1.348551 | 0.159751 |
| PPP1R15B | 1.151972 | 0.94025  | 1.411369 | 0.172136 |
| CDK5RAP3 | 0.854497 | 0.679191 | 1.075051 | 0.179523 |
| TMEM33   | 1.407397 | 0.852909 | 2.322365 | 0.18111  |
| ERLIN2   | 1.242966 | 0.892951 | 1.730179 | 0.197409 |
| HSPA13   | 1.188664 | 0.902407 | 1.565724 | 0.218899 |
| BBC3     | 1.109722 | 0.921389 | 1.33655  | 0.272574 |
| RNF121   | 0.773012 | 0.48373  | 1.235292 | 0.281718 |
| UFM1     | 1.246169 | 0.8186   | 1.897064 | 0.304693 |
| NFE2L1   | 0.863325 | 0.649273 | 1.147944 | 0.312061 |
| VAPB     | 0.809641 | 0.52964  | 1.237668 | 0.329454 |
| APAF1    | 0.868018 | 0.628927 | 1.198001 | 0.389225 |
| ATF4     | 1.135571 | 0.839582 | 1.535909 | 0.409291 |
| TATDN2   | 1.255444 | 0.729312 | 2.161133 | 0.411698 |
| BCL2L11  | 0.931354 | 0.780219 | 1.111765 | 0.431169 |
| CXXC1    | 0.875377 | 0.610998 | 1.254153 | 0.468128 |
| ITPR1    | 1.024105 | 0.926117 | 1.132461 | 0.642522 |
| ATP2A1   | 1.024952 | 0.915527 | 1.147456 | 0.668756 |
| SERP1    | 0.92189  | 0.623279 | 1.363563 | 0.683837 |
| PPP2CB   | 0.940308 | 0.690631 | 1.280247 | 0.695871 |
| TMEM129  | 1.062487 | 0.761105 | 1.483211 | 0.721756 |
| ERN1     | 0.978529 | 0.868088 | 1.103021 | 0.722425 |
| ALOX15   | 1.016185 | 0.920923 | 1.121301 | 0.749208 |
| YIF1A    | 1.045555 | 0.787539 | 1.388102 | 0.758009 |
| BHLHA15  | 1.020259 | 0.887827 | 1.172446 | 0.77738  |
| RNF186   | 1.075377 | 0.598608 | 1.931877 | 0.807901 |
| UBE2J1   | 0.954763 | 0.633818 | 1.438223 | 0.824737 |
| ATF6     | 1.033881 | 0.757187 | 1.411685 | 0.833925 |
| UBE2K    | 1.043205 | 0.701292 | 1.551815 | 0.834641 |
| UBQLN1   | 0.953804 | 0.604542 | 1.504845 | 0.838904 |
| AMFR     | 0.972452 | 0.666109 | 1.419684 | 0.884948 |
| TARDBP   | 0.959842 | 0.540963 | 1.703067 | 0.888585 |
| SERINC3  | 0.988838 | 0.738139 | 1.324684 | 0.940023 |
| UGGT2    | 1.002954 | 0.768135 | 1.309558 | 0.982707 |
| RNF139   | 1.000433 | 0.708254 | 1.413146 | 0.998039 |

---

**Supplementary Table 4.****Univariate and multivariate analysis of OS in CGGA sequencing dataset**

| <b>Variables</b>           | <b>Univariate analysis</b> |                | <b>Multivariate analysis</b> |                |
|----------------------------|----------------------------|----------------|------------------------------|----------------|
|                            | <b>HR (95% CI)</b>         | <b>p value</b> | <b>HR (95% CI)</b>           | <b>p value</b> |
| <b>Risk score</b>          | 7.227 (5.074-10.229)       | < 0.001        | 2.300 (1.072-4.932)          | 0.032          |
| <b>Age at Diagnosis</b>    | 1.038 (1.023-1.054)        | < 0.001        | 1.001 (0.980-1.023)          | 0.938          |
| <b>Gender</b>              | 1.181 (0.837-1.666)        | 0.345          | -                            | -              |
| <b>WHO Grade</b>           | 3.477 (2.716-4.452)        | < 0.001        | 2.072 (1.404-3.058)          | < 0.001        |
| <b>TCGA Subtype</b>        | 1.935 (1.641-2.282)        | < 0.001        | 1.160 (0.867-1.551)          | 0.318          |
| <b>IDH mutation status</b> | 0.228 (0.158-0.329)        | < 0.001        | 0.952 (0.448-2.026)          | 0.899          |
| <b>MGMT methylation</b>    | 0.528 (0.374-0.450)        | < 0.001        | 0.791 (0.503-1.242)          | 0.309          |
| <b>1p/19q co-deletion</b>  | 0.134 (0.049-0.363)        | < 0.001        | 0.544 (0.189-1.567)          | 0.260          |
| <b>Radiotherapy</b>        | 0.429 (0.296-0.622)        | < 0.001        | 0.402 (0.259-0.623)          | < 0.001        |
| <b>Chemotherapy</b>        | 1.378 (0.963-1.971)        | 0.079          | -                            | -              |
